# Supplementary material for: A rhodamine-based sensor for Hg2+ and resultant complex as a fluorescence sensor for I−
Source: Royal Society of Chemistry journal article supplement (doi:10.1039/c6ra17861h), 2016-01-01
Supplement: c6ra17861h1.pdf [file c6ra17861h1.pdf]

*Supporting information*

**A rhodamine-based sensor for Hg<sup>2+</sup> and resultant complex as a  
fluorescence sensor for I<sup>-</sup>**

Haichang Ding<sup>a,b</sup>, Chunhong Zheng<sup>b</sup>, Baoqiang Li<sup>a,\*</sup>, Gang Liu<sup>b</sup>, Shouzhi Pu<sup>b,\*</sup>, Dechang Jia<sup>a</sup>, Yu Zhou<sup>a</sup>

<sup>a</sup>Institute for Advanced Ceramics; State Key Laboratory of Urban Water Resource and Environment, Harbin Institute of Technology, Harbin 150001, PR China

<sup>b</sup>Jiangxi Key Laboratory of Organic Chemistry, Jiangxi Science and Technology Normal University, Nanchang 330013, PR China

\*Corresponding author: [libq@hit.edu.cn](mailto:libq@hit.edu.cn) (B. Li), [pushouzhi@tsinghua.org.cn](mailto:pushouzhi@tsinghua.org.cn) (S. Pu)

### **Figures captions:**

Fig. S1.  $^1\text{H}$  NMR (in  $\text{CDCl}_3$ ) and  $^{13}\text{C}$  NMR (in  $\text{CDCl}_3$ ) spectrums of **1**.

Fig. S2. ESI-MS spectrum of **1**.

Fig. S3. The relationship between the absorbance and  $\text{Hg}^{2+}$  concentration, taken from the inset of Fig. 4A.

Fig. S4. The LOD for  $\text{Hg}^{2+}$  by absorbance.

Fig. S5. The relationship between the emission intensity and  $\text{Hg}^{2+}$  concentration, taken from the inset of Fig. 4B.

Fig. S6. The LOD for  $\text{Hg}^{2+}$  by fluorescence.

Fig. S7. The relationship between the emission intensity and  $\text{I}^-$  concentration, taken from the inset of Fig. 7.

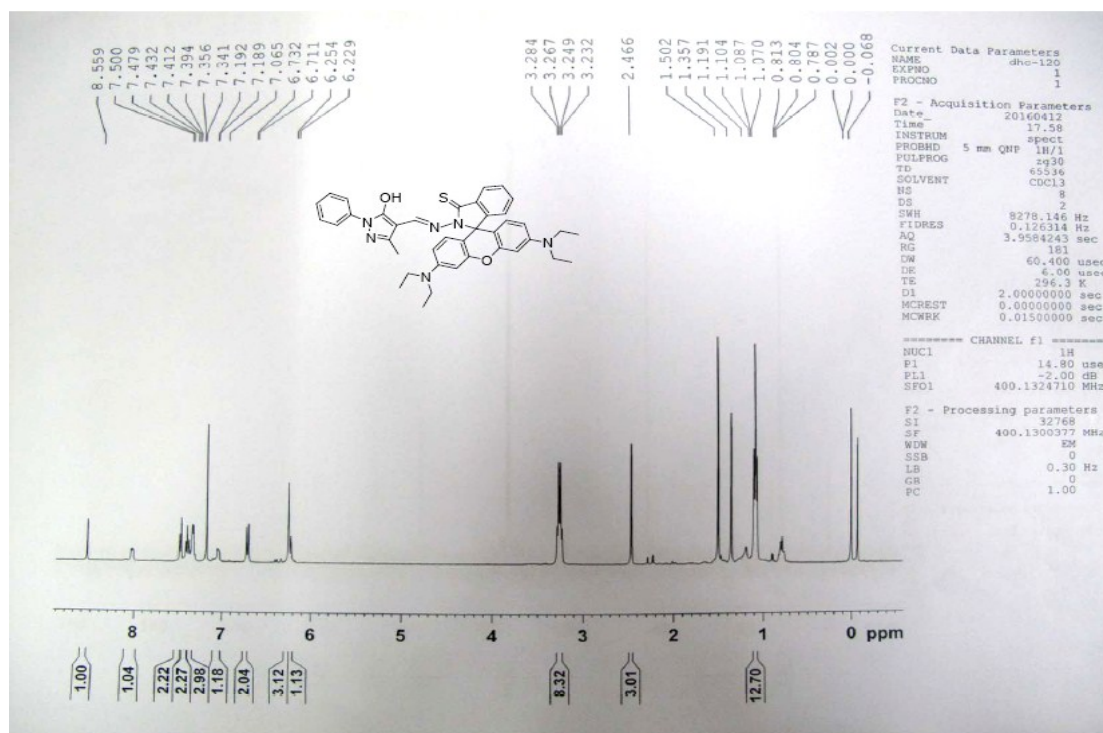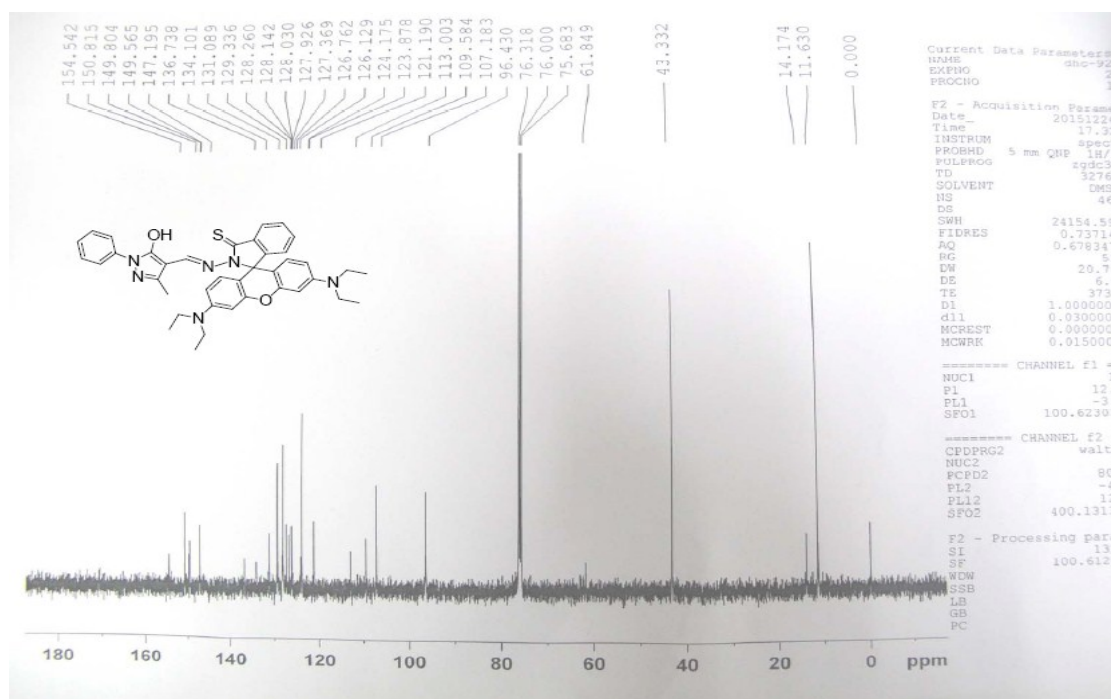

Fig. S1. <sup>1</sup>H NMR (in CDCl<sub>3</sub>) and <sup>13</sup>C NMR (in CDCl<sub>3</sub>) spectra of 1.

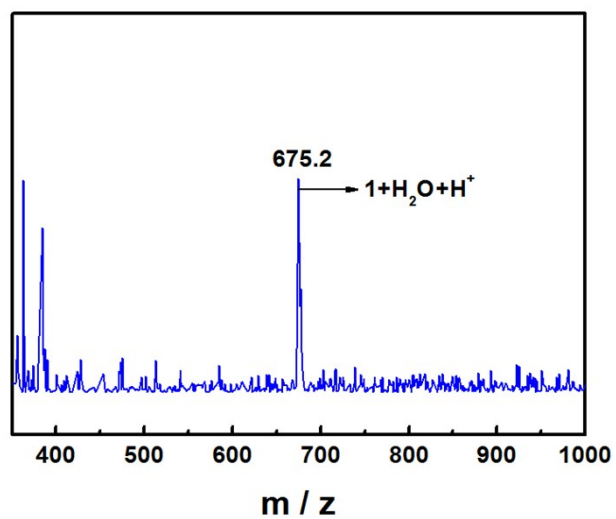

**Fig. S2.** ESI-MS spectrum of **1**.

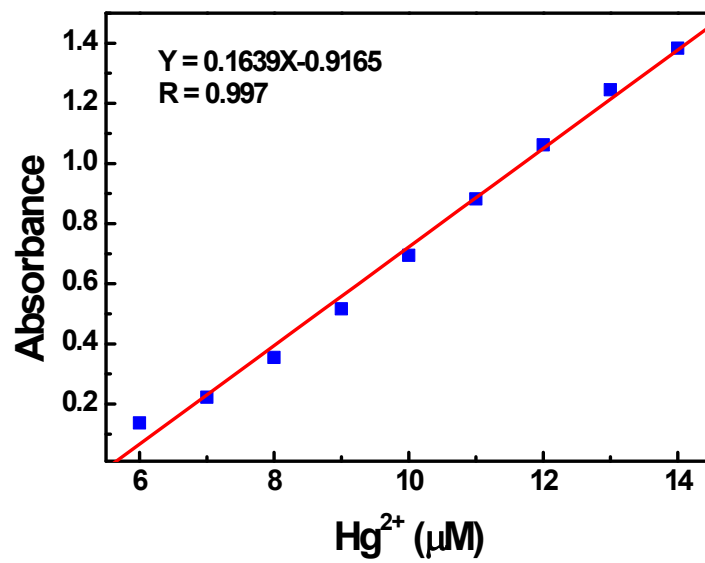

**Fig. S3.** The relationship between the absorbance and  $\text{Hg}^{2+}$  concentration, taken from the inset of Fig. 4A.

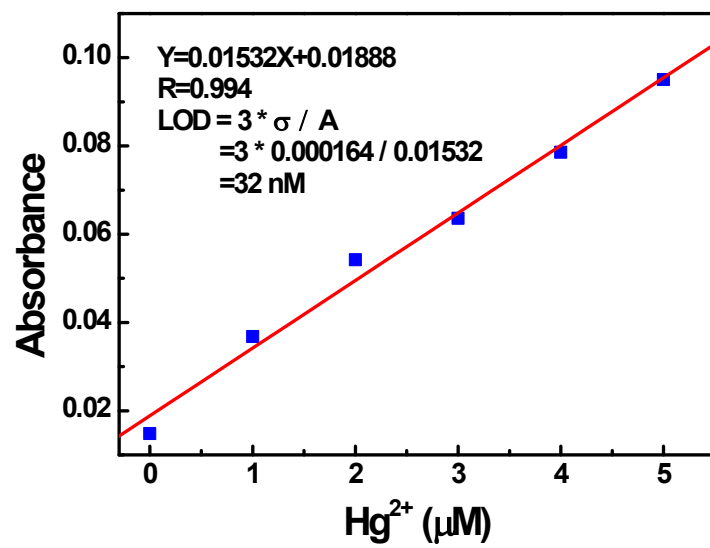

Fig. S4. The LOD for Hg<sup>2+</sup> by absorbance.

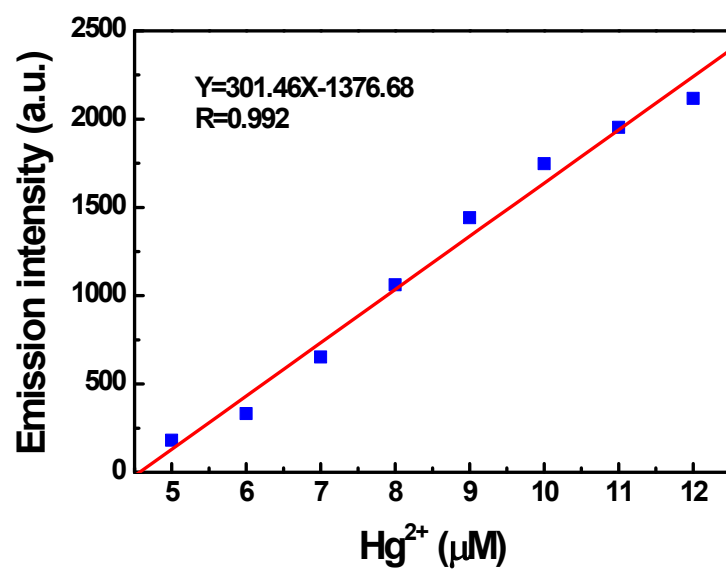

**Fig. S5.** The relationship between the emission intensity and  $\text{Hg}^{2+}$  concentration, taken from the inset of Fig. 4B.

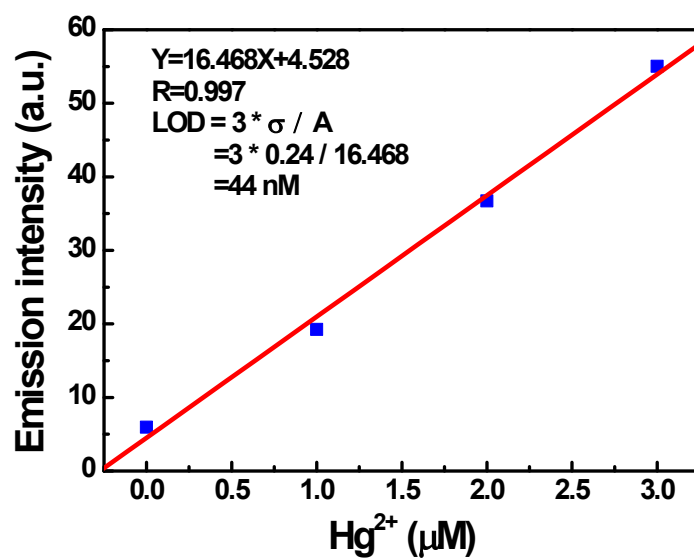

Fig. S6. The LOD for Hg<sup>2+</sup> by fluorescence.



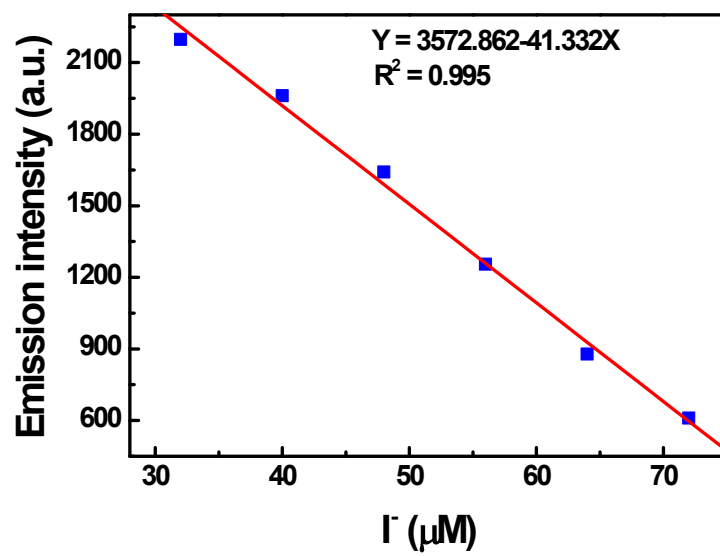

**Fig. S7.** The relationship between the emission intensity and  $I^-$  concentration, taken from the inset of Fig. 7.
